# Supplementary material for: Surface modificationviaplasmid-mediated pLAMA3-CM gene transfection promotes the attachment of gingival epithelial cells to titanium sheetsin vitroand improves biological sealing at the transmucosal sites of titanium implantsin vivo
Source: Royal Society of Chemistry journal article supplement (doi:10.1039/c9tb01715a), 2019-01-01
Supplement: c9tb01715a1.pdf [file c9tb01715a1.pdf]

## Supplementary Figures

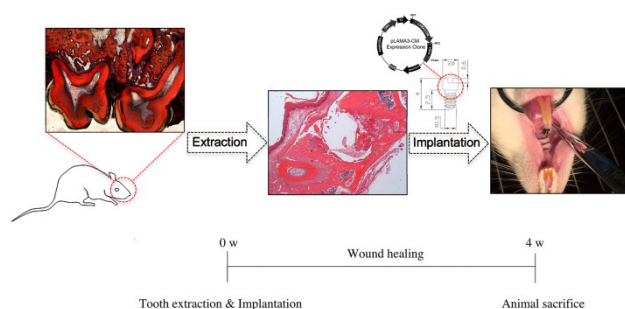

**Fig. S1.** Schematic illustration of the extraction of the upper first molar (right) from Sprague-Dawley (SD) rats followed by immediate implantation.

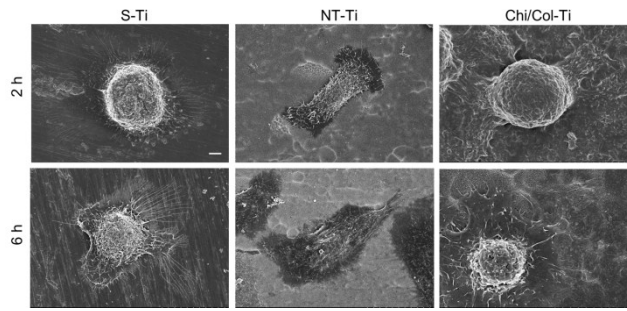

**Fig. S2.** Representative SEM images of hGECs seeded on S-Ti, NT-Ti, and Chi/Col-Ti sheets for 2 h and 6 h (scale bar = 4  $\mu\text{m}$ ).
